# Supplementary material for: Evaluation of a portfolio-based course on self-development for pre-medical students in Korea
Source: PubMed Central journal article supplement (PMC7040426; doi:10.3352/jeehp.2019.16.38), 2019-12-11
Supplement: jeehp-16-38-suppl2.pdf [file jeehp-16-38-suppl2.pdf]

**Supplement 2. 프로그램 평가 설문들**

| 번호                                                            | 문항                                                  | 응답                                      |
|---------------------------------------------------------------|-----------------------------------------------------|-----------------------------------------|
| <b>교과목 운영 전반: 운영 방식, 교육방법, 교육내용의 적절성 등에 대한 평가</b>             |                                                     |                                         |
| 1                                                             | 나는 수업 전에 이미 포트폴리오의 개념과 특성에 대해 알고 있었다.               | ① ② ③ ④ ⑤                               |
| 2                                                             | 오리엔테이션은 수업의 전반적인 과정을 이해하는데 도움이 되었다.                 | ① ② ③ ④ ⑤                               |
| 3                                                             | 제시된 학습성과는 명확하였다.                                    | ① ② ③ ④ ⑤                               |
| 4                                                             | 시간별 과정은 짜임새 있고 순서 있게 구성되었고 생각한다.                    | ① ② ③ ④ ⑤                               |
| 5                                                             | 매 과정의 시간과 분량은 적절하였다.                                | ① ② ③ ④ ⑤                               |
| 6                                                             | 본 교과목의 내용과 활동, 체험은 내가 따라갈 수 있는 수준이었다.               | ① ② ③ ④ ⑤                               |
| 7                                                             | 교수는 학생들의 적극적인 참여와 관심을 유도하였다.                        | ① ② ③ ④ ⑤                               |
| 8                                                             | 주어진 강의자료와 워크시트 등은 학습하는데 도움이 되었다.                    | ① ② ③ ④ ⑤                               |
| <b>(9~12) 아래의 방식은 포트폴리오 수업에 적합한 교육방법이었다.</b>                  |                                                     |                                         |
| 9                                                             | 강의                                                  | ① ② ③ ④ ⑤                               |
| 10                                                            | 개인 활동                                               | ① ② ③ ④ ⑤                               |
| 11                                                            | 팀 활동                                                | ① ② ③ ④ ⑤                               |
| 12                                                            | 다양한 검사                                              | ① ② ③ ④ ⑤                               |
| <b>(13~18) 아래의 활동은 학습성과 달성에 도움이 되었다.</b>                      |                                                     |                                         |
| 13                                                            | SWOT : 나의 강점, 약점, 기회, 위협 탐색 등                       | ① ② ③ ④ ⑤                               |
| 14                                                            | MBTI: 나와 타인의 성격, 사고방식에 대한 이해와 관계 형성 등               | ① ② ③ ④ ⑤                               |
| 15                                                            | 대학의 본질과 대학생이 된다는 것의 의미: 대학생으로서의 성숙한 태도와 올바른 가치 형성 등 | ① ② ③ ④ ⑤                               |
| 16                                                            | 미래 마스터플랜 설계: 성공적인 대학생활을 위한 목표와 수행 전략 수립 등           | ① ② ③ ④ ⑤                               |
| 17                                                            | 자기주도적 대학생활: 실패요인 분석을 통한 목표 설정, 학습전략, 시간관리 전략 수립 등   | ① ② ③ ④ ⑤                               |
| 18                                                            | 셀프리더십: 나의 학습동기 분석과 동기 강화 전략 수립 등                    | ① ② ③ ④ ⑤                               |
| <b>(19~20) 자기평가</b>                                           |                                                     |                                         |
| 19                                                            | 나는 주차별 과제 및 발표를 성실하게 준비하여 수행하였다.                    | ① ② ③ ④ ⑤                               |
| 20                                                            | 나는 수업에 적극적으로 참여하였다.                                 | ① ② ③ ④ ⑤                               |
| <b>포트폴리오 작성 경험과 성과: 스스로 포트폴리오를 구성하고 만들어 간 과제와 학습경험에 대한 평가</b> |                                                     |                                         |
| 21                                                            | 대학생활 전반을 성찰하는데 도움이 되었다.                             | ① ② ③ ④ ⑤                               |
| 22                                                            | 학업을 성찰하는데 도움이 되었다.                                  | ① ② ③ ④ ⑤                               |
| 23                                                            | 의예과 생활을 주도적으로 해 나가는데 도움이 되었다.                       | ① ② ③ ④ ⑤                               |
| 24                                                            | 의과대학 생활에 대한 방향 설정에 도움이 되었다.                         | ① ② ③ ④ ⑤                               |
| 25                                                            | 나의 삶, 의사로서의 삶에 대한 로드맵을 그리는데 도움이 되었다.                | ① ② ③ ④ ⑤                               |
| 26                                                            | 포트폴리오 양식은 필요한 요소로 잘 구성되었다.                          | ① ② ③ ④ ⑤                               |
| 27                                                            | 제공된 수업자료는 포트폴리오 작성에 도움이 되었다(검사 결과 프로파일, 워크시트 등).    | ① ② ③ ④ ⑤                               |
| 28                                                            | 포트폴리오 내용, 작성 과정에 개인의 자율성이 더 반영되어야 한다고 생각한다.         | ① ② ③ ④ ⑤                               |
| 29                                                            | 포트폴리오 작성 과정에 필요한 시간과 노력은 적절한 수준이었다.                 | ① ② ③ ④ ⑤                               |
| 30                                                            | 포트폴리오 작성으로 다른 학업에 방해를 받은 경험이 있다.                    | ① ② ③ ④ ⑤                               |
| 31                                                            | 나는 성실하고 진지한 자세로 포트폴리오를 만들고 완성해 갔다.                  | ① ② ③ ④ ⑤                               |
| 32                                                            | 다음 중 포트폴리오 피드백, 지도를 위해 선호하는 방식을 하나만 선택하여 V 표시하세요.   | 개인(일대일 멘토링)<br>그룹(10명 이하)<br>전체(60명 이상) |

\* Likert scale 1~5
